# Supplementary material
Source: PubMed Central journal article supplement (PMC3637018)
Supplement: supp_blood-2012-11-466227_blood-2012-11-466227-1.pdf [file supp_blood-2012-11-466227_blood-2012-11-466227-1.pdf]

## SUPPLEMENTAL MATERIAL

### Methods

**Human Primary Erythroid Cell Differentiation Media.** Following GFP sorting, CD34<sup>+</sup> cells were incubated in IMDM supplemented with 20% fetal bovine serum, 10ng/ml of SCF, 1u/ml EPO, 1ng/ml IL-3, 1 $\mu$ M Dexamethasone, 1 $\mu$ M Estradiol, and 2% Penicillin/Streptomycin for three days. The cells were then changed to a differentiation media consisting of IMDM supplemented with 20% fetal bovine serum, 1u/ml EPO, 10ng/ml Insulin, and 2% Penicillin/Streptomycin and cultured for a period of 10 days. Cells were spun down and fresh differentiation media was added every other day.

**Co-Immunoprecipitation Assays.** Immunoprecipitation assays with 10 million CID cells per group were carried out using a commercial kit (SIGMA, FLAG Immunoprecipitation kit cat# FLAGIPT1); rProtein G beads were purchased from Invitrogen (#15920-010). Prior to the experiment, the protein G beads were washed 4 times by spinning down at 500g for 30 seconds 4°C, discarding the supernatant and adding equal volume of 1X wash buffer (40 $\mu$ L of beads were used per reaction). 1mL of lysis buffer containing protease inhibitors was added per 10 million cells. Samples were vortexed and placed on a rotator at 4°C for a half an hour. The samples were then spun down at 1300g for 10 minutes at 4°C and the supernatant was used for pre-clearing as follows: 40 $\mu$ L of protein-G beads were added to each 1mL of supernatant, and samples were placed on a rotator for 2 hours. Samples were then spun at 5000g for 30 seconds at 4°C. 30 $\mu$ L of supernatant were then removed and stored in -80° as

input control. The remaining supernatant was then divided and incubated either with 15 $\mu$ g of MBD2 antibody (Santa Cruz) or 15 $\mu$ g of normal goat IgG. Samples were placed on a rotator overnight at 4°C, then washed 5 times by spinning at 5000g for 30 seconds 4°C, and re-suspended in 1mL of wash buffer. After adding 2x loading buffer samples were then boiled for 5 minutes, spun down at 13000rpm for 30 seconds at room temperature and supernatants were subjected to western blotting as described<sup>25</sup>. Antibodies used for western blot include MBD2 (Santa Cruz sc-1244), p66 $\alpha$  (Upstate #07-365), HDAC-2 (Millipore #05-814), RbAp48 (abcam ab79416), MTA-2 (Santa Cruz sc-28731).

**High Performance Liquid Chromatography (HPLC).** 10 million human erythroid (CD235a and CD71 double positive) cells were collected from either control shSCR or shMi2 $\beta$  treated cultures at day 10 of differentiation. Cells were spun at 300xg for 5 minutes, lysed, and hemolysates were subjected to HPLC for hemoglobin variant testing in the VCUHS Clinical Hematology Laboratory under CLIA certified assay conditions.

**ChIP Assay Coordinates.** DNA was sonicated sufficiently to obtain an average fragment size of  $\sim$ 700bp. Primers used to detect Mi2 $\beta$  enrichment at the BCL11A and KLF1 promoter region/first exon are included in Table S1. BCL11A primers were designed to generate PCR products that extend from +134bp to +337bp relative to the transcriptional start site. KLF1 primers were designed to generate PCR products that extend from -476bp to -399bp relative to the transcriptional start site.

**KLF1 over-expression.** The KLF1 expression vector (pSG5/KLF1) was a kind gift from Dr. James Bieker.  $5 \times 10^6$  CID cells were transfected with 5 $\mu$ g of plasmid and 1  $\mu$ Molar Mi2 $\beta$  siRNA (QIAGEN) via nucleofection (Lonza) as previously described. Cells were collected at 24 hours in order to test KLF1 expression levels, compared to a scramble control and again at 72 hours in order to test the effect on  $\gamma$ -globin RNA level by qPCR.

**Antibodies.** Antibodies used for Western blots include MBD2 (Santa Cruz, Dallas, TX, USA, sc-1244), CHD4/Mi2 $\beta$  (Abcam, Cambridge, MA, USA ab54603), KLF1/EKLF (Abcam ab88417), FOG-1 (Santa Cruz sc-9361), BCL11A (Abcam ab19487). Antibodies used for fluorescence activated cell sorting (FACS) profiling include anti-human CD71 (eBioscience, San Diego, CA, USA #17-0719-42) and Anti-human CD235a (eBioscience #12-9987-82). Antibodies used for ChIP assays consisted of 7 $\mu$ g of either ChIP-grade Mi2 $\beta$  antibody (Abcam ab70469), or Normal Mouse IgG (Millipore #12-371).

**Table S1**

|                                                    | Forward                            | Reverse                              | Probe                                           |
|----------------------------------------------------|------------------------------------|--------------------------------------|-------------------------------------------------|
| Human $\gamma$ -globin                             | GTG GAA GAT GCT GGA<br>GGA GAA A   | TGC CAT GTG CCT TGA<br>CTT TG        | FAM/AGG CTC CTG GTT GTC<br>TAC CCA TGG ACC /BHQ |
| Human $\beta$ -globin                              | GCA AGG TGA ACG TGG<br>ATG AAG T   | TAA CAG CAT CAG GAG<br>TGG ACA GA    | FAM/CA GGC TGC TGG TGG TCT<br>ACC CTT GGA CCC   |
| Murine $\alpha$ -globin                            | AAT ATG GAG CTG AAG<br>CCC TGG     | ACA TCA AAG TGA GGG<br>AAG TAG GTC T |                                                 |
| Murine glycophorin A                               | GCC GAA TGA CAA AGA<br>AAA GTT CA  | TCA ATA GAA CTC AAA<br>GGC ACA CTG T | FAMTTGACATCCAATCTCTGA<br>GGGTGGTGA /BHQ         |
| Murine MBD2                                        | TTT GAC TTC AGG ACC<br>GGC AAG ATG | ATT GCT CGG GTG GTT<br>CGT GAA TTT   |                                                 |
| Murine Mi2 $\beta$                                 | GAA CCA CAG GGA GTT<br>AAT GAG     | CTT ATA GAG GGA GTA<br>GAG GAA GAC   |                                                 |
| Murine Mi2 $\alpha$                                | GAT GAA GAC TTT GAT<br>GAG CGT     | ACA CAT AGG CCT TAA<br>ACT CCT       |                                                 |
| Murine $\alpha$ -1- spectrin                       | TTA GCA CCA CAT ACA<br>AAC AC      | AAA CAT ATC CTT TCC<br>TCC CTG       |                                                 |
| Murine aminolevulinate<br>dehydratase (Alad)       | GAG TTC CCA AGG ATG<br>AAC AG      | CTC CTC TGC TAG GAA<br>TGC TC        |                                                 |
| Murine Ferrochelatase                              | GCG AGG TGG TCA TTC<br>TGT TT      | ACT GGA CCA ACC TTG<br>GAC TG        |                                                 |
| Murine erythropoietin (EPO)<br>Receptor            | CCC AAG TTT GAG AGC<br>AAA GC      | TGC AGG CTA CAT GAC<br>TTT CG        |                                                 |
| Murine transferrin Receptor                        | ATA AGC TTT GGG TGG<br>GAG GC      | CTT GCC GAG CAA GGC<br>TAA AC        |                                                 |
| Murine GATA-1                                      | CTG GGA TCG CCT ACA<br>ACC TC      | CTG CCA CAA GGT CAA<br>GGC TA        |                                                 |
| Murine glucose-6-phosphate<br>dehydrogenase (G6PD) | TCG AAA TTG TAG GGG<br>CAG CG      | CCA TTT AAC GCA AGA<br>GGG CG        |                                                 |
| Murine uroporphyrinogen III<br>synthase (Uros)     | GCT GCC TCT TCT CTT<br>TCC GT      | TGC ATG CTT TCC ATG<br>GGG AT        |                                                 |
| Murine cyclophilin A                               | GAG CTG TTT GCA GAC<br>AAA GTT C   | CCC TGG CAC ATG AAT<br>CCT GG        |                                                 |
| Murine FOG-1                                       | TTC TGG TGG ACT GCT<br>ATA TGT G   | AAG ACG TCC TTG TTG<br>ATG AC        |                                                 |
| Human KLF1                                         | GCA AGA GCT ACA CCA<br>AGA G       | GTG TTT CCG GTA GTG GC               |                                                 |
| Human $\gamma$ -globin promoter                    | GCC TTG ACC AAT AGC<br>CTT GAC A   | GAA ATG ACC CAT GGC<br>GTC TG        |                                                 |
| Human Mi2 $\beta$                                  | ATA AAG ATA AGC CAT<br>TGC CTC C   | GAC ATA TGC CTT GAA<br>CTC TTT CTC   |                                                 |
| Human BCL11A                                       | AAC CCC AGC ACT TAA<br>GCA AA      | GGA GGT CAT GAT CCC<br>CTT CT        |                                                 |
| Human BCL11A Promoter                              | TCC TTC TTT CTA ACC<br>CGG CTC     | CTG CGC GCT CTC GTG<br>ATT AT        |                                                 |
| Human GAPDH Promoter                               | TCC CCT TCC TGC AGA<br>CAG CTC C   | AGG GAG GGC AGC ATA<br>CCG GG        |                                                 |
| Human KLF1 Promoter                                | GCC TGG GCC CCC ACC<br>TGA TA      | GAC TTG GCA CGA GCT<br>CCC CG        |                                                 |

**Table S1.** Primers used for all experiments described in the methods section.

**Table S2****shSCR**

| Procedure:                        | Ref Range:       | Units:   |            |
|-----------------------------------|------------------|----------|------------|
| Hemoglobin A                      | [95.0-99.0]      | %        | 95.6       |
| Hemoglobin A2                     | [1.2-3.0]        | %        | 3.1        |
| <b>Hemoglobin F</b>               | <b>[0.0-2.0]</b> | <b>%</b> | <b>1.3</b> |
| <b>Mi2<math>\beta</math> mRNA</b> |                  | <b>%</b> | <b>100</b> |

**shMi2 $\beta$** 

| Procedure:                        | Ref Range:       | Units:   |             |
|-----------------------------------|------------------|----------|-------------|
| Hemoglobin A                      | [95.0-99.0]      | %        | 84.8        |
| Hemoglobin A2                     | [1.2-3.0]        | %        | 2.0         |
| <b>Hemoglobin F</b>               | <b>[0.0-2.0]</b> | <b>%</b> | <b>13.2</b> |
| <b>Mi2<math>\beta</math> mRNA</b> |                  | <b>%</b> | <b>74.8</b> |

**Table S2****Mi2 $\beta$  knockdown increases HbF levels in human primary erythroid cells.**

Results obtained by high performance liquid chromatography assay carried out in the VCUHS CLIA approved clinical hematology laboratory showing a >10-fold increase in HbF after Mi2 $\beta$  knockdown (shMi2 $\beta$ ) compared to scramble control (shSCR). qPCR assay showed the level of knockdown in the shMi2 $\beta$  treated primary erythroid cells was ~25%.

**Figure S1**

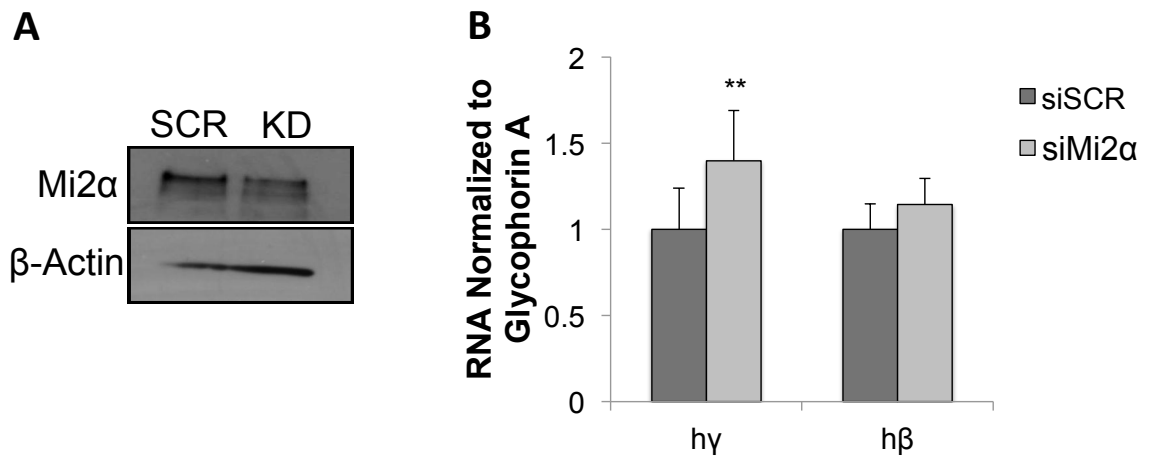

**Figure S1**

**Mi2α knockdown exerts only a small effect on  $\gamma$ -globin gene expression in CID cells.**

(A) Western blot showing Mi2 $\alpha$  protein level knockdown in CID cells. (B) qPCR data showing Mi2 $\alpha$  knockdown leads to a ~1.4-fold induction of  $\gamma$ -globin (h $\gamma$ ) gene expression and no significant increase in  $\beta$ -globin (h $\beta$ ) gene expression. \*\*signifies  $p < 0.02$  according to the student's t-test.

## Figure S2

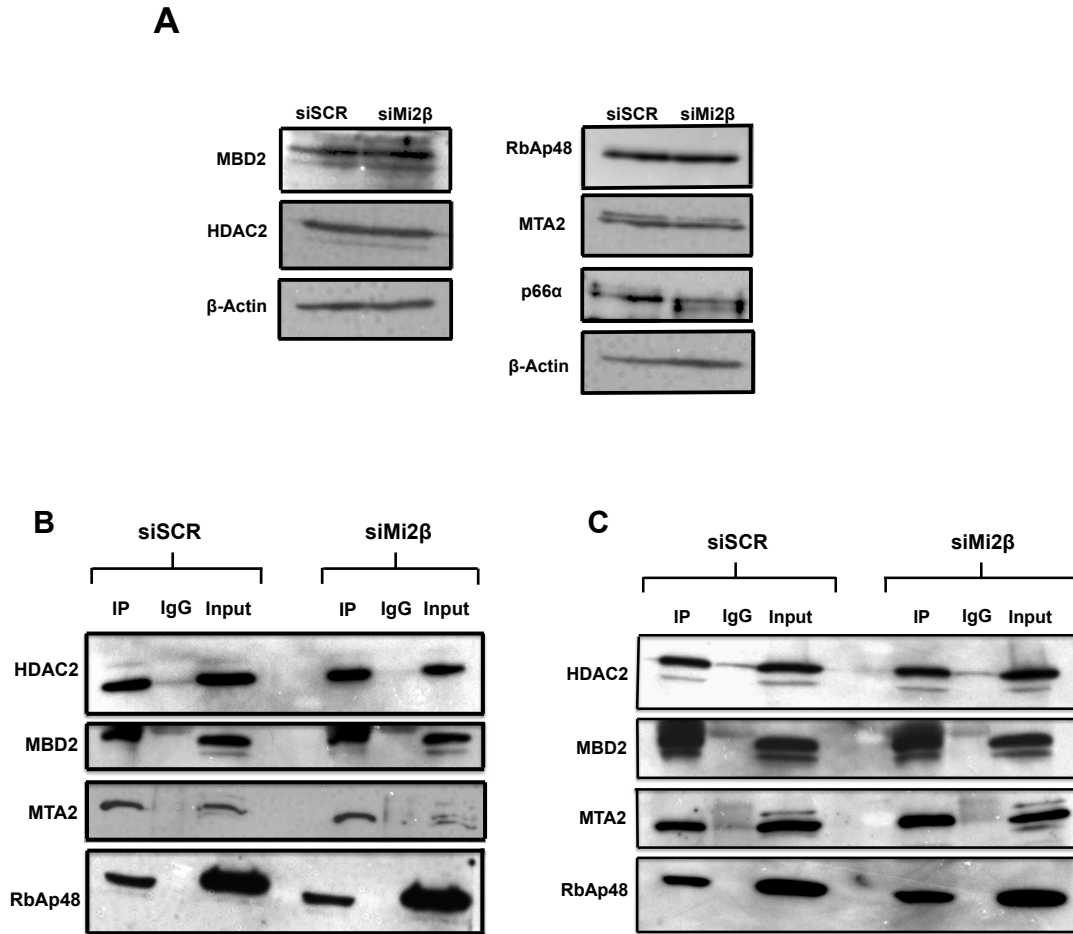

## Figure S2

### **Mi2 $\beta$ knockdown does not lead to destabilization of the MBD2/NuRD complex.**

(A) Western blot of CID cell extracts showing MBD2/NuRD complex components 72 hours after Mi2 $\beta$  knockdown. (B-C) Western blots showing MBD2/NuRD complex components following co-immunoprecipitation reactions with either MBD2 antibody or IgG control for samples transfected with either siMi2 $\beta$  or siSCR control. To account for the potential increased stability of preformed MBD2/NuRD complexes, experiments were carried out at both 24 hours (B) and 72 hours (C) post-transfection.

**Figure S3**

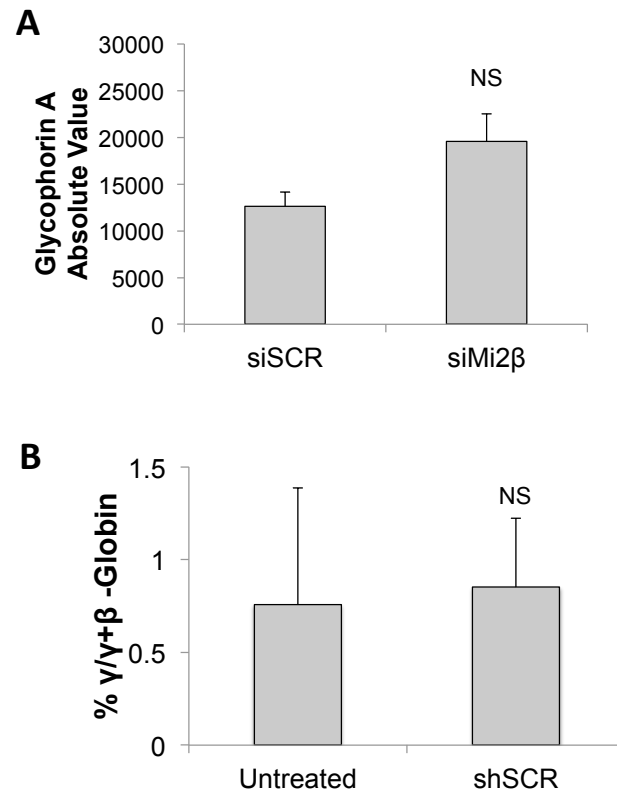

**Figure S3**

**Glycophorin A levels are unchanged in CID cells upon Mi2 $\beta$  knockdown and similar low levels of  $\gamma$ -globin mRNA are present in untreated and Scramble shRNA treated human primary erythroid cells.**

(A) Absolute values of Glycophorin A/5ng of RNA determined by qPCR show no significant difference between siScramble control and siMi2 $\beta$  samples in CID cells. (B) Untreated (no shRNA) cells show no significant difference than shSCR control in the expression of  $\gamma/\gamma+\beta$  after 10 days of erythroid differentiation in human primary erythroid cells. At this stage, cells show less than 1%  $\gamma$ -globin when normalized to  $\gamma+\beta$ -globin gene expression. NS = Not statistically significant.



**Figure S4**

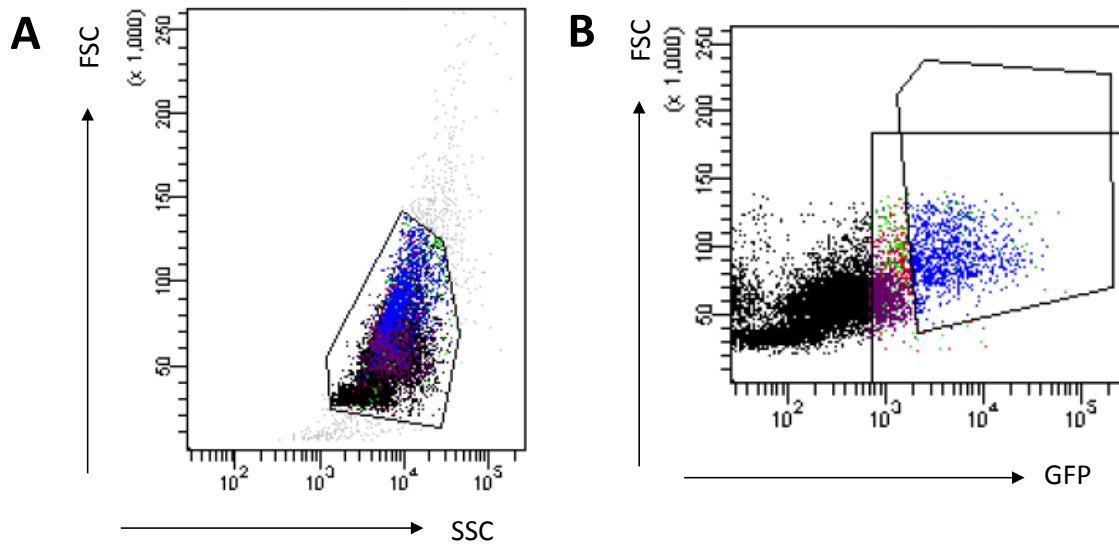

**Figure S4**

**GFP expression in cells undergoing erythroid cell differentiation versus myeloid cell differentiation.**

(A) Forward scatter vs. side scatter plots showing that differentiated erythroid cells, depicted in magenta (Figure 3H, Quadrant 2), are smaller in size than cells lacking erythroid markers depicted in blue (Figure 3H, Quadrant 3). (B) GFP expression levels showing that the larger cells (blue) have higher GFP than differentiated erythroid cells (magenta).

**Figure S5**

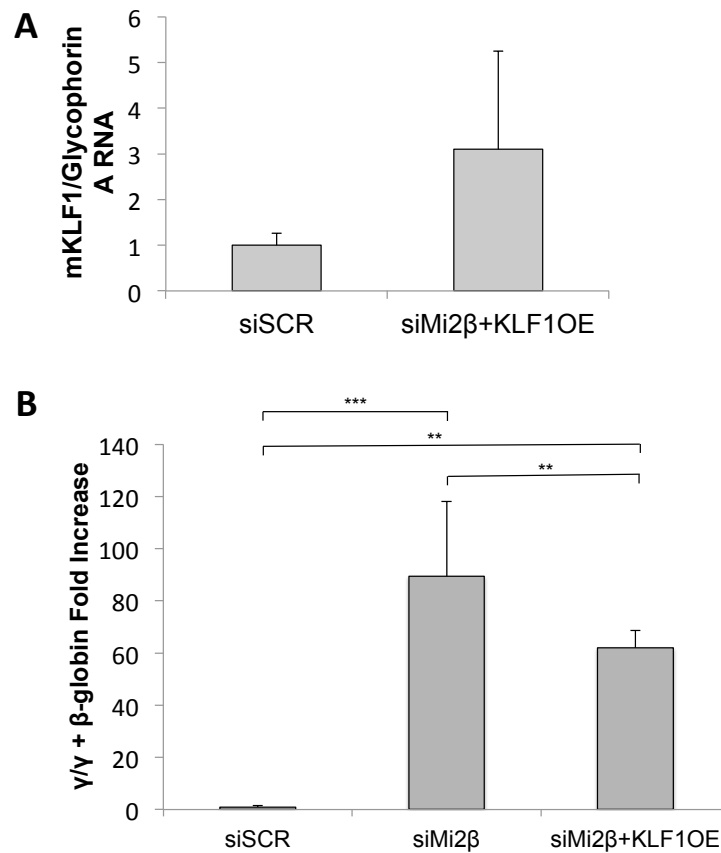

**Figure S5**

**KLF1 overexpression significantly decreases  $\gamma/\gamma+\beta$  gene expression after Mi2 $\beta$  knockdown in CID cells.**

(A) qPCR results showing that KLF1 RNA is expressed ~3-fold higher in samples transfected with Mi2 $\beta$  siRNA and KLF1 expression vector (siMi2 $\beta$  + KLF1 OE) than scramble control cells (siSCR) at 24 hours post-transfection. (B) qPCR data showing that enforced KLF1 expression in Mi2 $\beta$  knockdown cells leads to a significant decrease in  $\gamma/\gamma+\beta$  expression compared to Mi2 $\beta$  knockdown alone at 72 hours (62-fold induction vs. 89-fold induction). \*\*signifies  $p < 0.02$ , and \*\*\*signifies  $p < 0.001$  according to the student's t-test.
